# Supplementary material
Source: HighWire-hosted journal article supplement (https://www.jneurosci.org/highwire/filestream/600268/field_highwire_adjunct_files/3/Figure_S4.pdf)

mouse e11.5 brachial

*Isl1* *FoxP1*    *Isl1*    *FoxP1*    *Src*    *NF*

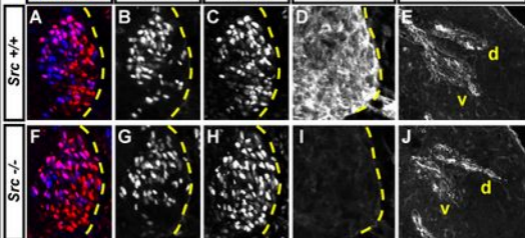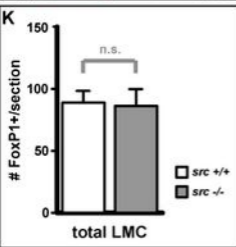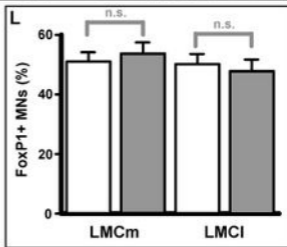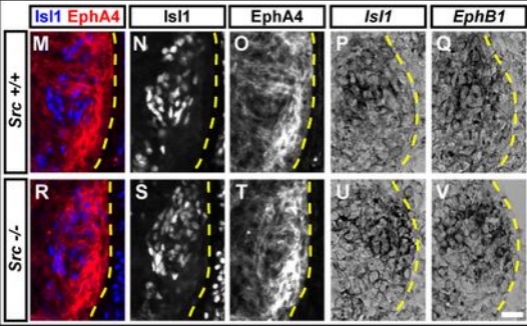

Supplement: Figure_S4.pdf [file Figure_S4.pdf]
